# Supplementary material for: Taiyuanostachya: An Abominable Angiosperm from the Early Permian of China
Source: Research Square preprint supplement (doi:10.21203/rs.3.rs-1768512/v1), 2022-06-23
Supplement: Supplementary file 1 [file 5bb9dd28d95c0f1d060142b7.pdf]

***Taiyuanostachya*: An Abominable Angiosperm from the Early Permian of China**

**Materials and Methods**

Most of the specimens (GP0093, GP0094, GP0094-A, GP0095) were collected by Gao from exposures of the Lower Shihhotse Formation, Lower Permian, in Simugedong approximately 5 km northeast of East Hill Mine, Taiyuan, Shanxi, China. The flora assemblage are composed of pteridophytes, cycadophytes, and Noeggerathiales<sup>1</sup>.

One additional specimen (B461) was collected in 1980 by Zhu and Du<sup>2</sup> from the Lower Shihhotse Formation, Lower Permian of East Hill, Taiyuan, Shanxi, China. The primary result of Zhu and Du's outcome is the publication of *Primocycas chinensis* Zhu and Du. The specimen is in the specimen case containing *Primocycas chinensis*.

During both excursions, the collectors found that the *Taiyuanostachya* gen. nov specimens were associated with *Taniopteris* spp., *Tingia hamaguchii*, *Sphenopteris* spp., *Emplectopteris triangularis*, *Sphenophyllum* sp., *Cathaysiopteris whitei*, *Primocycas chinensis*, *Crosszamia minor*, *C. cucullata*, *C. spadicia*, *Tianbaolinia circinalis*, *Discinites dentilongus*<sup>1-5</sup>. This assemblage is typical of the Lower Shihhotse Formation, Lower Permian <sup>6</sup>.

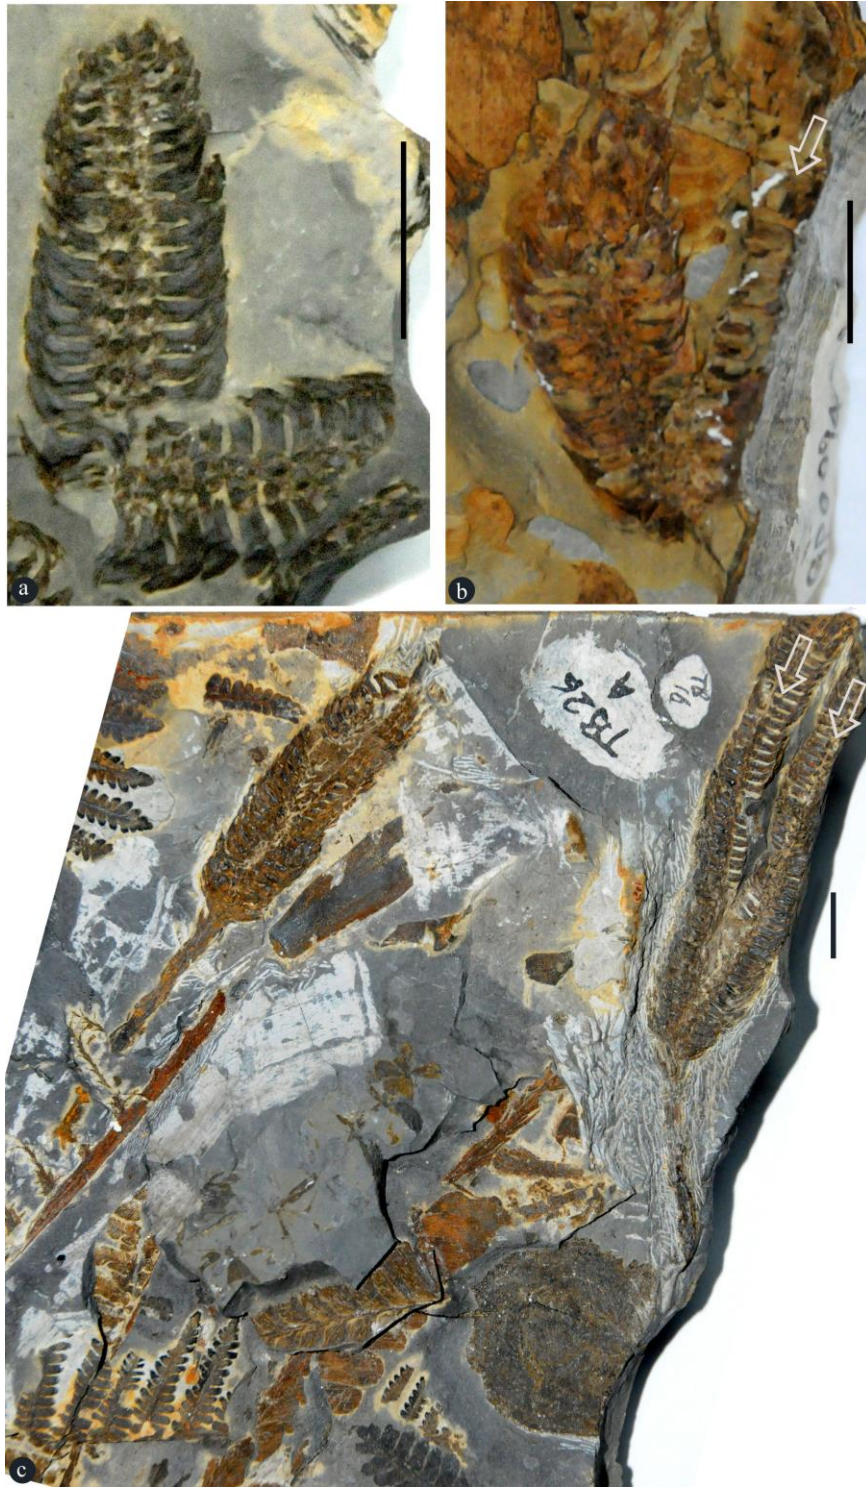

18

19 **Figure S1 General view specimens of *Taiyuanostachya* gen. nov.** **A.** *T. ovuilifera* gen. et sp. nov.  
 20 B461, deposited in the Beijing Museum of Natural History, Beijing, China. Scale bar = 1 cm. **B.** *T.*  
 21 *ovuilifera* gen. et sp. nov. Counterpart of the specimen shown in Fig. 1a. GP0094-A. Scale bar = 1  
 22 cm. **C.** Several specimens of *T. ovuilifera* gen. et sp. nov and associated fossils preserved on the  
 23 same slab. GP0093. Scale bar = 1 cm.

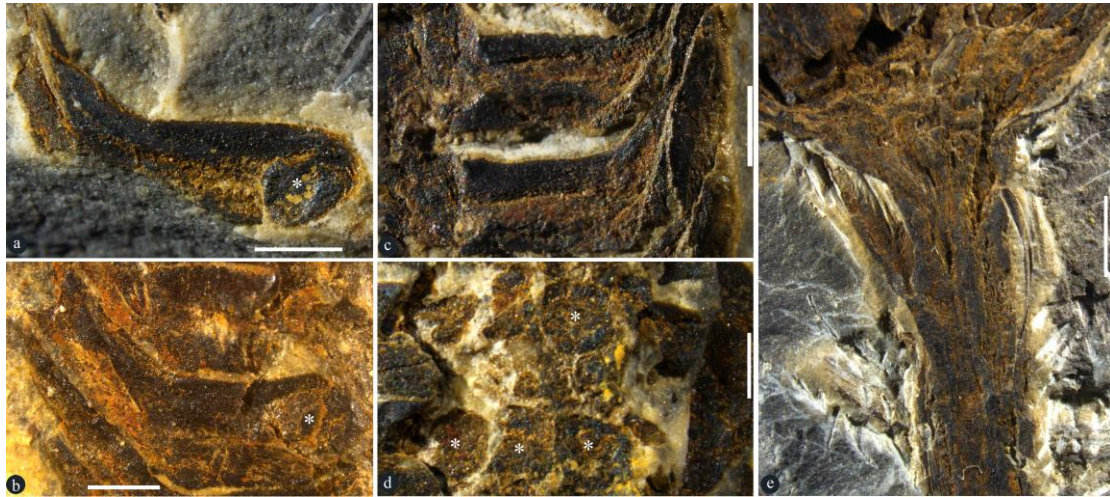

**Figure S2 Detailed views of lateral appendages of *Taiyuanostachya ovulifera* gen. et sp. nov and a closely associated leaf. A.** A basally broken lateral appendage showing exposed ovule/seed (asterisks). GP0095, Scale bar = 1 mm. **B.** A basally broken lateral appendage showing exposed ovule/seed (asterisks). GP0093. Scale bar = 1 mm. **C.** A lateral appendage with up-turning distal part. GP0093. Scale bar = 1 mm. **D.** Detailed view of the specimen shown in Fig. 1d, showing ovules/seeds (asterisks) directly attached to the axis. GP0095. Scale bar = 1 mm. **E.** Junction between the peduncle and the organ. Note scales on the peduncle. Scale bar = 2 mm.



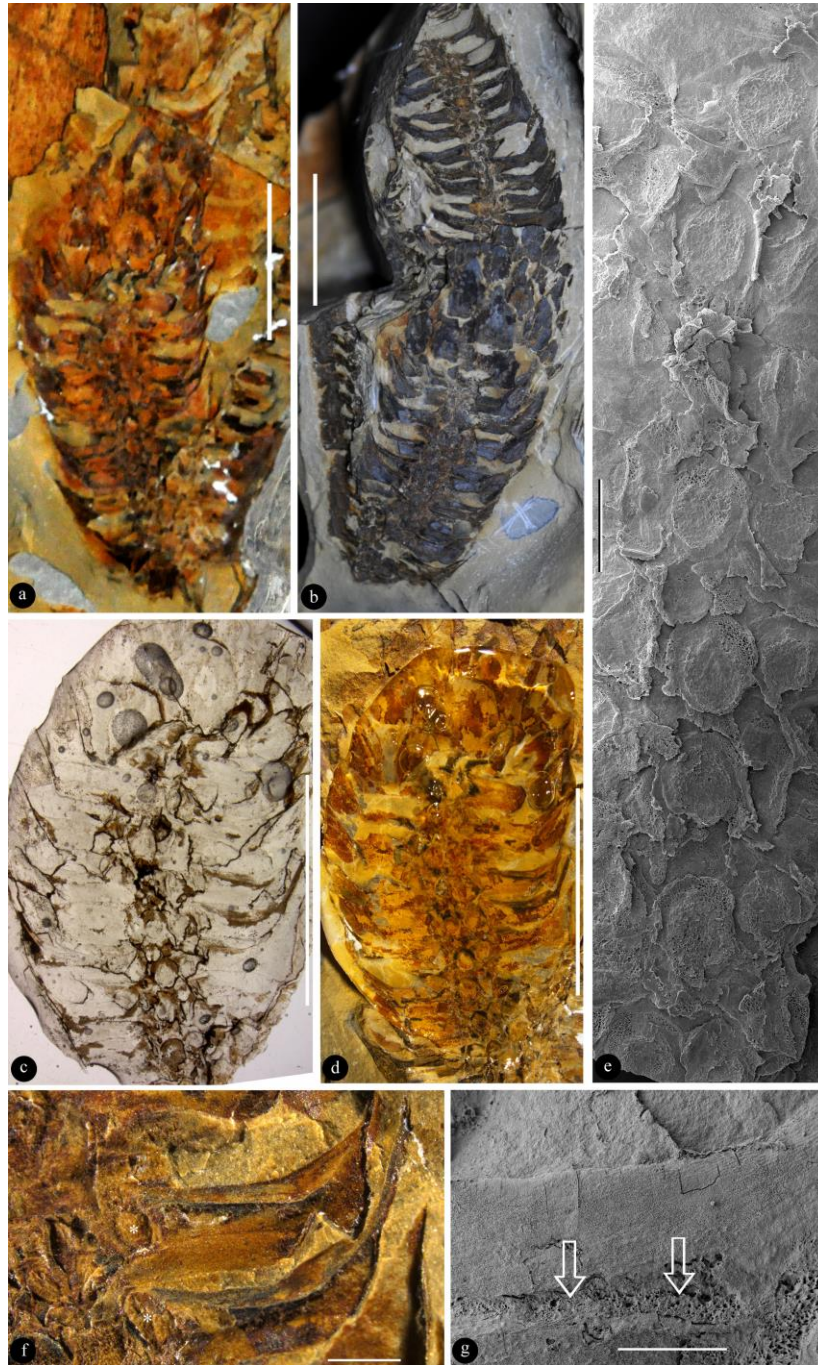

**Figure S3 SEM view of lateral appendages of *Taiyuanostachya ovulifera* gen. et sp. nov.**  
 GP0094-A. **A-B.** Two facing parts of the same specimen. Scale bar = 1 cm. **C-D.** Nitric cellulose peel, cleansed and intact, of the specimen in Fig. S3a. Scale bar = 1 cm. **E.** Numerous ovules/seeds attached to the axis of the organ. Scale bar = 1 mm. **F.** Two lateral appendages, with *in situ* ovules/seeds (asterisks). SEM details of the lower one are shown in Fig. S3a. Scale bar = 1 mm. **G.** SEM details of a lateral appendage, showing its smooth upper surface and spongy filling in the central canal (arrows). Scale bar = 0.5 mm.

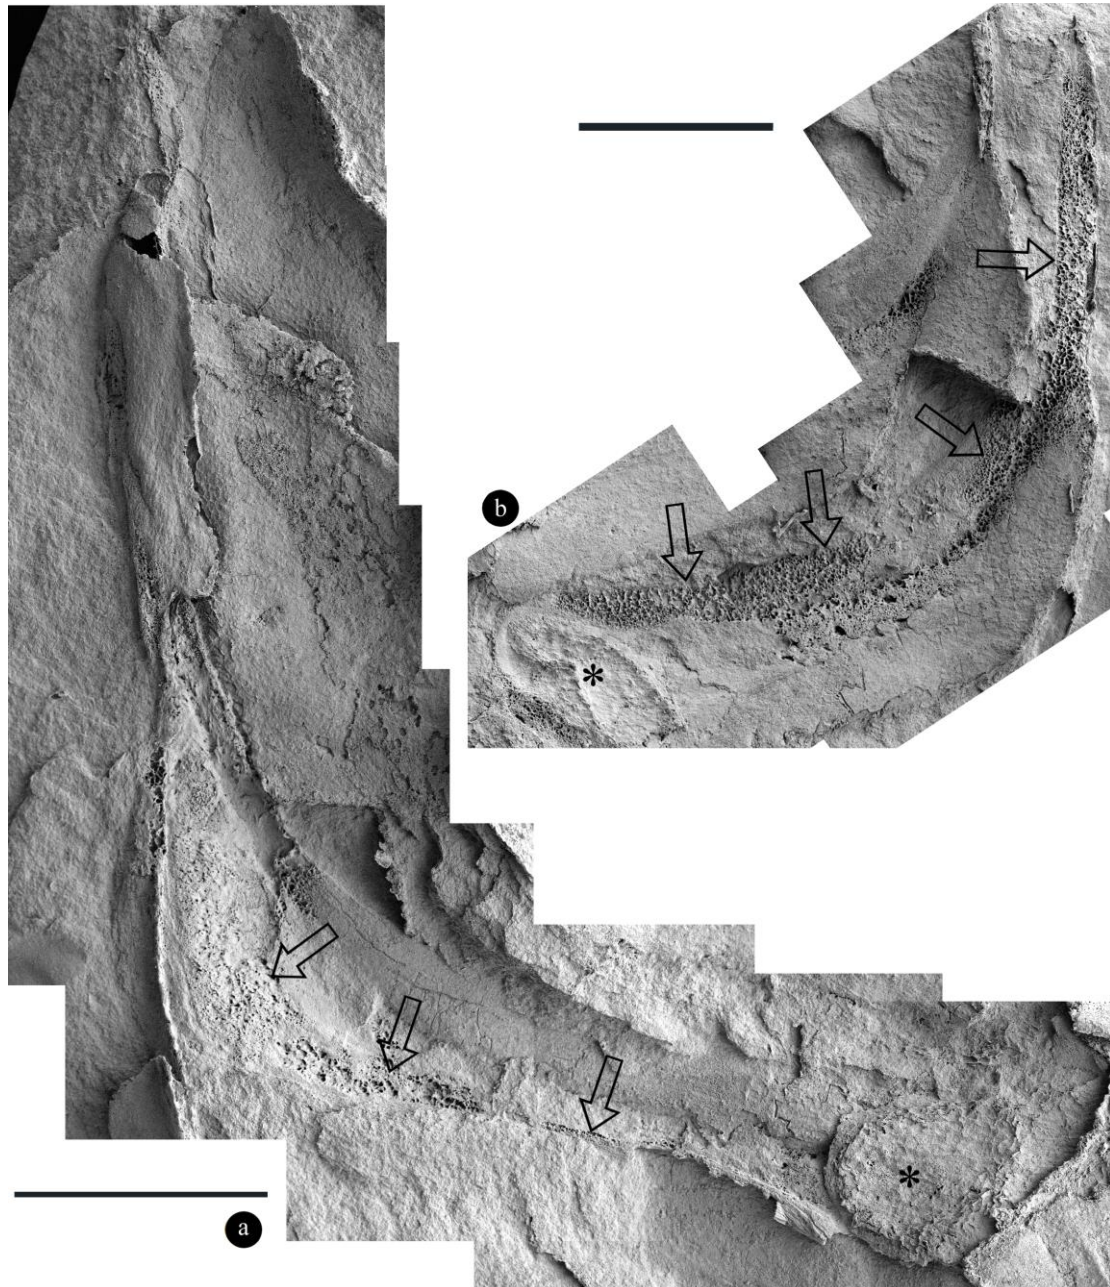

**Figure S4 SEM views of lateral appendages in *Taiyuanostachya* gen. nov. A.** A median section of a lateral appendage, showing ovule/seed (asterisk), central canal (arrows) with spongy filling, and up-turning distal part. **B.** A median section of the lateral appendage shown in Fig. S3f, showing ovule/seed (asterisk), central canal (arrows) with spongy filling, and up-turning distal part.



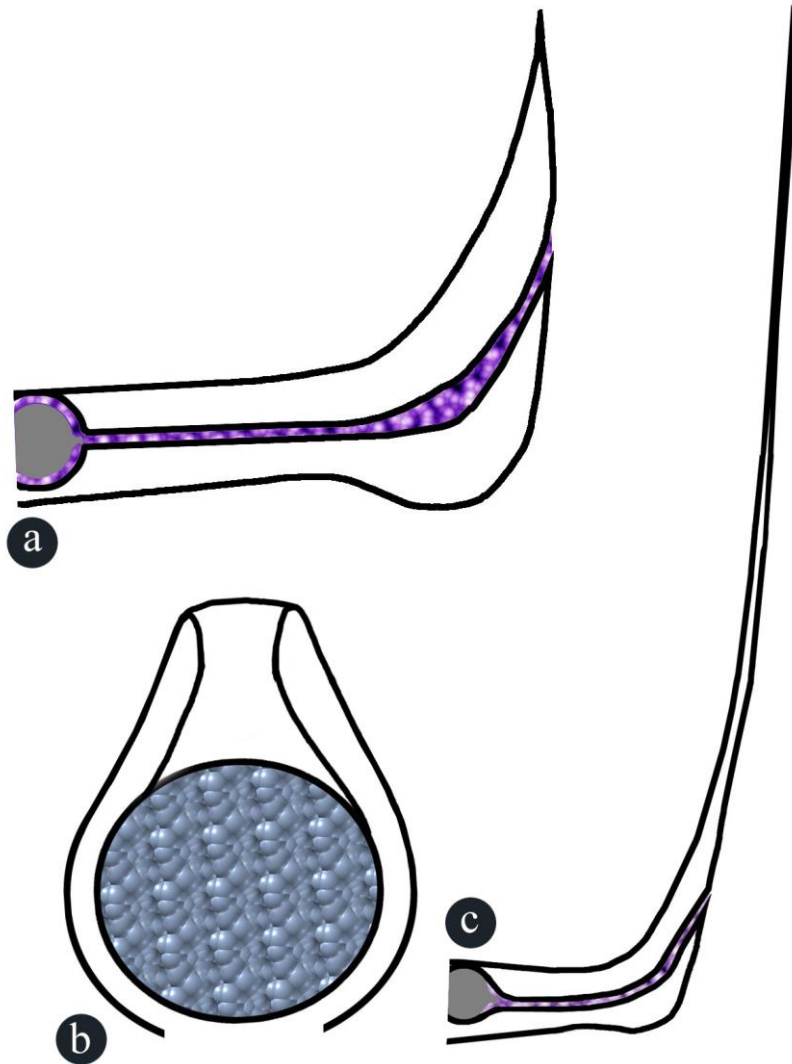

**Figure S5 Idealized reconstructions of lateral appendages and ovule in *Taiyuanostachya* gen. nov.** **A.** A median section of a lateral appendage, showing ovule/seed (left), central canal (arrows) with spongy filling, and up-turning distal part. **B.** A median section of ovule, showing micropyle, integument, and nucellus. **C.** A lateral appendage with a central canal and a filamentous tip.

## References

- 1 Gao, Z. & Thomas, B. A. A re-evaluation of the plants *Tingia* and *Tingiostachya* from the Permian of Taiyuan, China. *Palaeontology* **30**, 815-828, (1987).
- 2 Zhu, J. N. & Du, X. M. A new cycad -- *Primocycas chinensis* gen. et sp. nov. discovered from the Lower Permian in Shanxi, China and its significance. *Acta Botanica Sinica* **23**, 401-404, (1981).
- 3 Gao, Z. & Thomas, B. A. A review of cycad megasporophylls with new evidence of *Crossozamia* Pomel and its associated leaves from the Lower Permian of Taiyuan, China. *Review of Palaeobotany and Palynology* **60**, 205-223, (1989).
- 4 Gao, Z. & Thomas, B. A. An enigmatic cone from the Lower Permian of Taiyuan, China. *Review of Palaeobotany and Palynology* **68**, 197-201, (1991).

- 64 5 Gao, Z. & Thomas, B. A. A new species of *Discinites* from the Lower Permian of China.  
65 *Review of Palaeobotany and Palynology* **81**, 185-192, (1994).
- 66 6 Li, X. & Yao, Z. in *Papers for the 9th International Congress of Carboniferous Stratigraphy*  
67 *and Geology* (eds D. Thomas & H.W. Pfefferkorn)Ch. 5, 95-101 (South Illinois University  
68 Press, 1985).
- 69
